# Supplementary material for: Structure engineering: extending the length of azaacene derivatives through quinone bridges
Source: Royal Society of Chemistry journal article supplement (doi:10.1039/c8tc00628h), 2018-01-01
Supplement: c8tc00628h1.pdf [file c8tc00628h1.pdf]

## Supporting Information

### Structure Engineering: Extending the Length of Azaacenes Derivatives through Quinone Bridge

Zilong Wang,<sup>‡a</sup> Zongrui Wang,<sup>‡a</sup> Yecheng Zhou,<sup>b</sup> Peiyang Gu,<sup>a</sup> Guangfeng Liu,<sup>a</sup> Kexiang Zhao,<sup>a</sup> Lina Nie,<sup>a</sup> Qingsheng Zeng,<sup>a</sup> Jing Zhang,<sup>a</sup> Yongxin Li,<sup>c</sup> Rakesh Ganguly,<sup>c</sup> Naoki Aratani,<sup>d</sup> Li Huang,<sup>b</sup> Zheng Liu,<sup>a</sup> Hiroko Yamada,<sup>\*d</sup> Wenping Hu,<sup>\*e</sup> and Qichun Zhang<sup>\*ac</sup>

<sup>a</sup>School of Materials Science and Engineering, Nanyang Technological University Singapore, Singapore 639798, Singapore

<sup>b</sup>Department of Physics, Southern University of Science and Technology, Shenzhen 518055, People's Republic of China

<sup>c</sup>Division of Chemistry and Biological Chemistry, School of Physical and Mathematical Sciences, Nanyang Technological University, 639798, Singapore, Singapore

<sup>d</sup>Graduate School of Materials Science, Nara Institute of Science and Technology, Ikoma, 630-0192, Japan

<sup>e</sup>Tianjin Key Laboratory of Molecular Optoelectronic Sciences, Department of Chemistry, School of Science & Collaborative Innovation Center of Chemical Science and Engineering (Tianjin), Tianjin University, Tianjin 300072, People's Republic of China

### Table of Content

|                                                                                                                      |            |
|----------------------------------------------------------------------------------------------------------------------|------------|
| <b>Experiment method and instruments</b> .....                                                                       | <b>S2</b>  |
| <b>Materials</b> .....                                                                                               | <b>S2</b>  |
| <b>Instruments and methods</b> .....                                                                                 | <b>S2</b>  |
| <b>Single-crystal X-ray diffraction</b> .....                                                                        | <b>S2</b>  |
| <b>Synthesis details (Including NMR and HR-MS spectra)</b> .....                                                     | <b>S3</b>  |
| <b>Supporting Figures</b> .....                                                                                      | <b>S13</b> |
| <b>Figure S16.</b> Molecular crystal structures of <b>Hex-CO</b> and <b>Hept-CO</b> .....                            | <b>S13</b> |
| <b>Figure S17.</b> AFM images of thin films at different annealing temperatures.....                                 | <b>S14</b> |
| <b>Figure S18.</b> Images of the as-casted micro crystals of <b>Hex-CO</b> and <b>Hept-CO</b> .....                  | <b>S14</b> |
| <b>Figure S19.</b> Hopping route of <b>Hex-CO</b> in the crystal .....                                               | <b>S15</b> |
| <b>Figure S20.</b> Hopping route of <b>Hept-CO</b> in the crystal .....                                              | <b>S15</b> |
| <b>Supporting Tables</b> .....                                                                                       | <b>S16</b> |
| <b>Table S1.</b> Crystallographic data and structure refinement parameters of <b>Hex-CO</b> and <b>Hept-CO</b> ..... | <b>S16</b> |
| <b>Table S2.</b> The electronic couplings for all the hopping pathways of <b>Hex-CO</b> .....                        | <b>S17</b> |
| <b>Table S2.</b> The electronic couplings for all the hopping pathways of <b>Hept-CO</b> .....                       | <b>S17</b> |
| <b>Reference</b> .....                                                                                               | <b>S18</b> |

## Experimental methods and instruments

### Materials

All the chemicals and solvents are purchased and used without further treatment unless special note. Chloroform and *N,N*-Diisopropylethylamine (Hünig's base) was dried by refluxing with  $\text{CaH}_2$  for 24 h.

### Instruments and methods

Electrospray ionization high-resolution mass spectrum (HR-MS (ESI)) was recorded on a Waters Q-ToF premier<sup>TM</sup> mass spectrometer.  $^1\text{H}$ -NMR and  $^{13}\text{C}$ -NMR were tested on Bruker Advance 300 spectrometer and the chemical shift values were given in ppm. UV-vis absorbance was tested on a Shimadzu UV-2501 spectrophotometer. Cyclic voltammetry was tested on a CHI 604E Electrochemical Analyzer. Glassy carbon (diameter: 1.6 mm; area 0.02 cm<sup>2</sup>) was used as working electrode, platinum wires were used as counter electrode and reference electrode, respectively.  $^n\text{Bu}_4\text{NPF}_6$  (0.1M) was used as supporting electrolyte. The potential was recorded in an anhydrous DCM solution and the scanning rate was 50 mV/s.  $\text{Fc}^+/\text{Fc}$  (HOMO = -4.80 eV) was used as an external standard.

### Single-crystal X-ray diffraction

The suitable black block-shaped single-crystals of Hex-CO and Hept-CO were selected for single-crystal X-ray data collection with a Bruker SMART APEXII CCD area detector on a D8 goniometer at 90-100 K. Data were collected using graphite-monochromated and 0.5 mm-Mono Cap-collimated Mo-K $\alpha$  radiation ( $\lambda = 0.71073 \text{ \AA}$ ) with the  $\omega$  scan method. The data were processed with the INTEGRATE program of the APEX3 software for reduction and cell refinement. Multi-scan absorption corrections were applied by using the SCALE program for area detector. The Structures were solved by the direct method and refined by the full-matrix least-squares method on  $F^2$  (SHELX-97).<sup>1</sup> All non-H atoms were refined anisotropically. Hydrogen atoms were placed in idealized positions and included as riding with  $U_{\text{iso}}(\text{H}) = 1.2 U_{\text{eq}}(\text{C})$ .

## Synthesis details

### Synthesis of 6,17-bis((triisopropylsilyl)ethynyl)naphtho[2,3-b]quinoxalino[2,3-i]phenazine-8,15(7H,16H)-dione (Compound 5)

The diamine compound **1** (114 mg, 0.2 mmol), dichloride compound **2** (125 mg, 0.45 mmol), 2-dicyclohexylphosphino-2',6'-diisopropoxybiphenyl (RuPhos) (7 mg, 0.015 mmol), Tris(dibenzylideneacetone)dipalladium(0) (Pd<sub>2</sub>(dba)<sub>3</sub>) (14 mg, 0.015 mmol), dry Hünig's base (5 mL) and dry chloroform (20 mL) were added into the Schlenk flask under argon atmosphere. Subsequently, the mixture was further bubbled with argon for 5 min to remove the oxygen. Then, the solution was stirred at 70 °C for 48 h. After the mixture was cooled to room temperature, it was filtered on celite and washed with methylene chloride until the filtrate is colorless. The filtrate was washed with saturated ammonium chloride solution and extracted with methylene chloride. After the organic layer was collected and dried with Na<sub>2</sub>SO<sub>4</sub>, followed by filtration and the removing of solvents, the residue was purified by silica gel column chromatography (Eluent: CH<sub>2</sub>Cl<sub>2</sub> : Hex = 1 : 3). The as-obtained crude product was dissolved in small amount CHCl<sub>3</sub> and reprecipitated by adding methanol. The solid was collected by filtration and washed with methanol to afford pure compound **5** (115 mg, 0.15 mmol, 74%) as brown solid. <sup>1</sup>H NMR (300 MHz, CDCl<sub>3</sub>): δ = 8.56 (s, 2H), 8.04 – 7.83 (m, 4H), 7.73 – 7.41 (m, 6H), 1.45 – 1.14 (m, 42H). <sup>13</sup>C NMR (75 MHz, CDCl<sub>3</sub>) δ = 174.88, 144.10, 142.41, 138.02, 134.70, 130.13, 129.57, 129.16, 129.08, 128.61, 126.98, 126.26, 106.27, 101.19, 97.96, 18.88, 11.42. HR-MS (ESI) m/z Calc. for [M+H]<sup>+</sup> C<sub>48</sub>H<sub>55</sub>N<sub>4</sub>O<sub>2</sub>Si<sub>2</sub>: 775.3864, found : 775.3848.

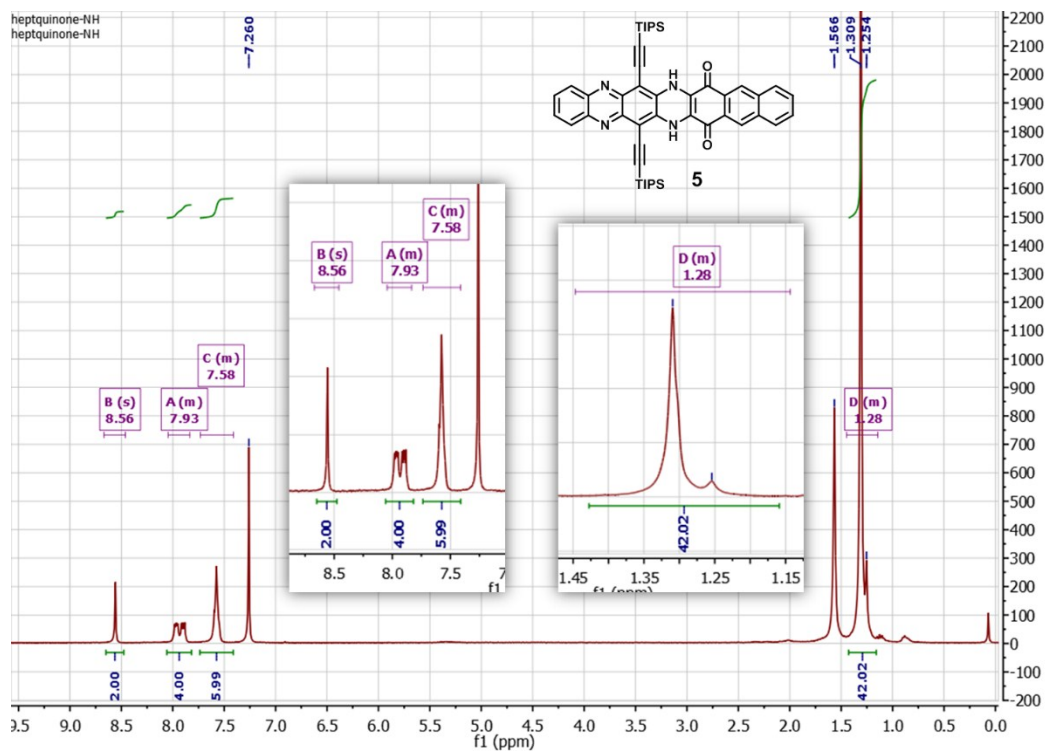

Figure S1.  $^1\text{H}$  NMR spectrum of compound **5**

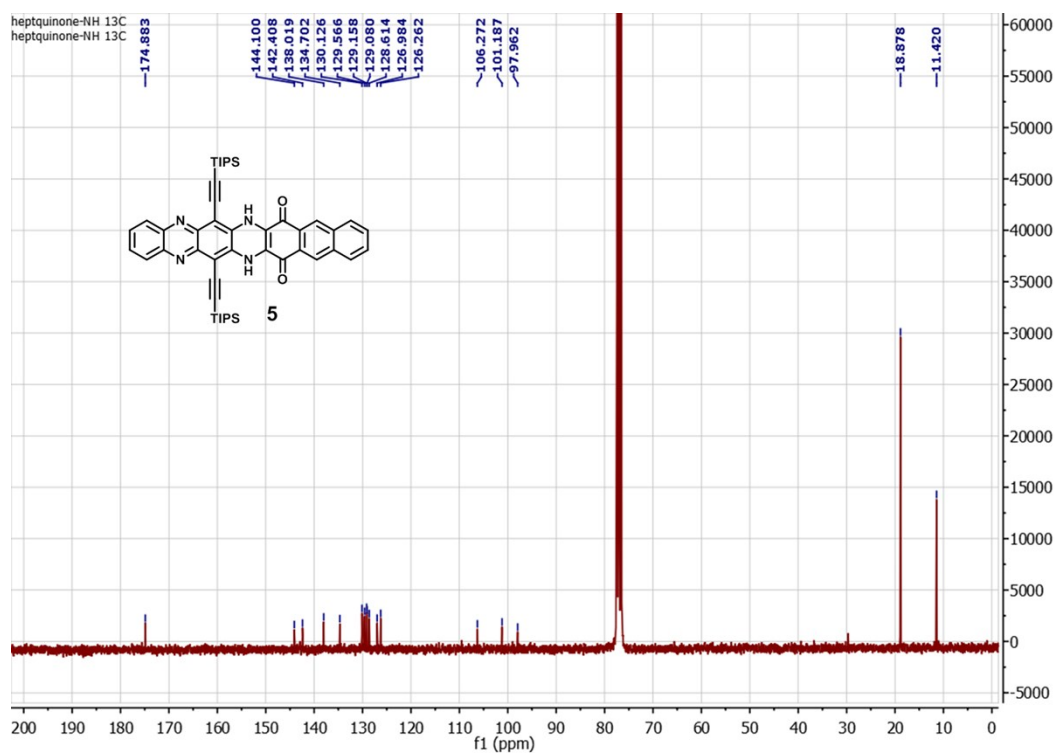

Figure S2.  $^{13}\text{C}$  NMR spectrum of compound **5**

# Elemental Composition Report

Page 1

## Single Mass Analysis

Tolerance = 10.0 PPM / DBE: min = -1.5, max = 50.0

Element prediction: Off

Number of isotope peaks used for i-FIT = 2

Monoisotopic Mass, Even Electron Ions

16 formula(e) evaluated with 1 results within limits (up to 50 closest results for each mass)

Elements Used:

C: 0-48 H: 0-55 N: 0-4 O: 1-2 Si: 0-2

C48H55N4O2Si2

WZL8 17 (0.396)

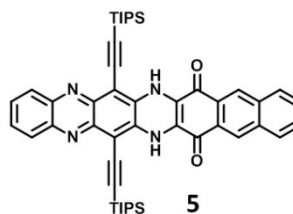

1: TOF MS ES+  
4.05e+000

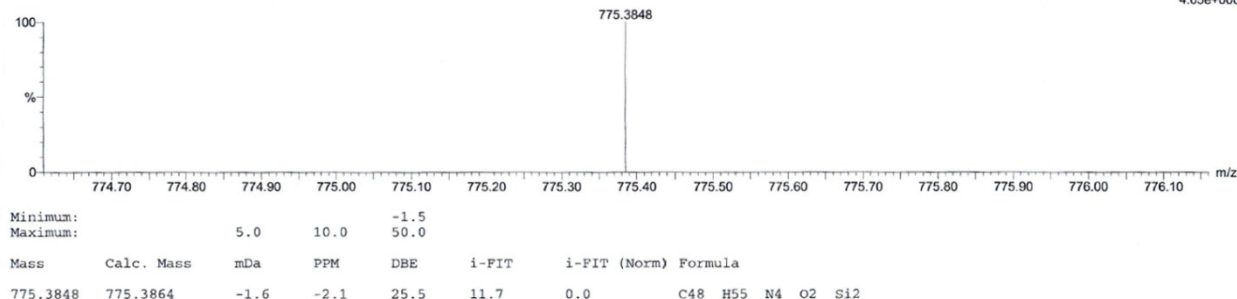

**Figure S3.** HR-MS spectrum of compound **5**

## 6,15-bis((triisopropylsilyl)ethynyl)benzo[b]quinoxalino[2,3-i]phenazine-8,13(7H,14H)-dione (Compound 6)

Compound **6** was synthesized according to the same procedure for the preparation of compound **5**, by using compound **1** (114 mg, 0.2 mmol), dichloride compound **3** (103 mg, 0.45 mmol), RuPhos (7 mg, 0.015 mmol), Pd<sub>2</sub>(dba)<sub>3</sub> (14 mg, 0.015mmol), dry Hünig's base (5 mL) and dry chloroform (15 mL). Compound **6** (120 mg, 0.17 mmol, 85%) was obtained as brown solid. <sup>1</sup>H NMR (300 MHz, CDCl<sub>3</sub>) δ = 8.12 – 8.01 (m, 2H), 7.94 – 7.84 (m, 2H), 7.73 – 7.64 (m, 2H), 7.63 – 7.52 (m, 2H), 7.49 (s, 2H), 1.31 – 1.20 (m, 42H). <sup>13</sup>C NMR (75 MHz, CDCl<sub>3</sub>) δ = 175.68, 144.18, 142.40, 138.23, 133.79, 130.37, 129.15, 129.08, 126.18, 124.78, 106.28, 101.13, 97.99, 18.85, 11.39. HR-MS (ESI) m/z Calc. for [M+H]<sup>+</sup> C<sub>44</sub>H<sub>53</sub>N<sub>4</sub>O<sub>2</sub>Si<sub>2</sub>: 725.3707, found : 725.3674.

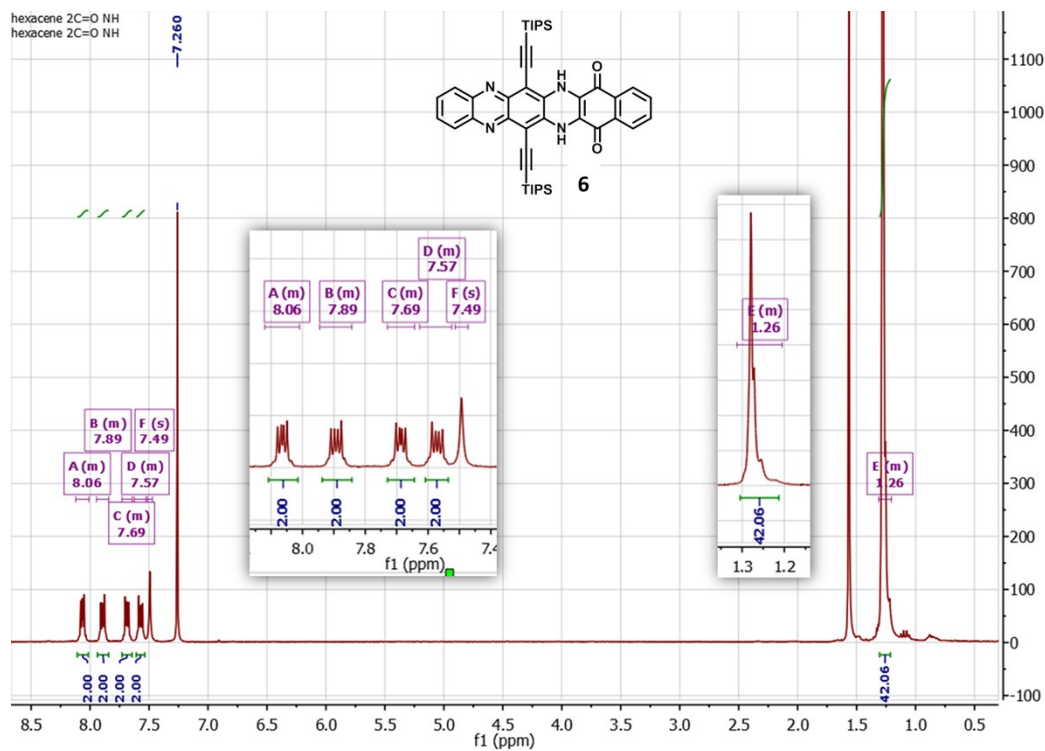

## Single Mass Analysis

Tolerance = 10.0 PPM / DBE: min = -1.5, max = 50.0

Element prediction: Off

Number of isotope peaks used for i-FIT = 3

Monoisotopic Mass, Even Electron Ions

34 formula(e) evaluated with 1 results within limits (up to 50 closest results for each mass)

Elements Used:

C: 0-44 H: 0-53 N: 0-4 O: 0-2 Si: 0-2

C44H52N4O2Si2

WZL1 4 (0.101) Cm (1.453)

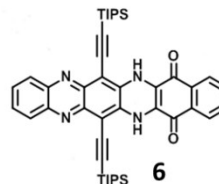1: TOF MS ES+  
4.39e+003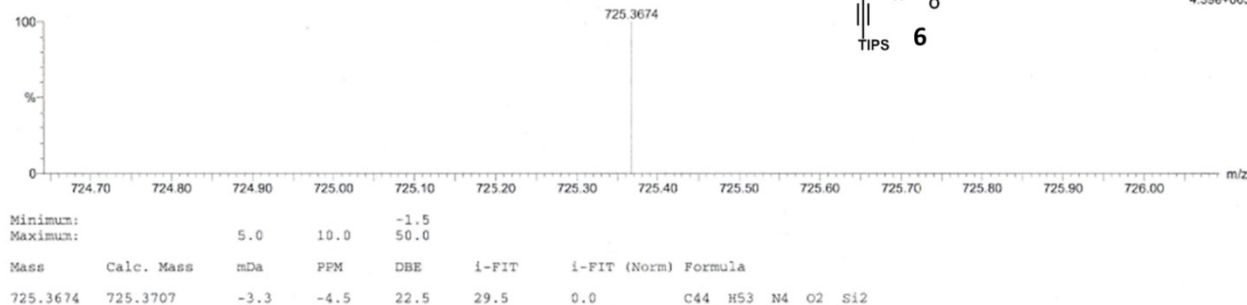

Figure S6. HR-MS spectrum of compound 6

### 1-chloro-6,13-bis((triisopropylsilyl)ethynyl)-6a,7,12,12a-tetrahydroquinoxalino[2,3-b]phenazin-2(14H)-one (Compound 8)

Compound **8** was synthesized according to the same procedure for the preparation of compound **5**, by using compound **1** (114 mg, 0.2 mmol), dichloride compound **4** (80 mg, 0.45 mmol), RuPhos (7 mg, 0.015 mmol), Pd<sub>2</sub>(dba)<sub>3</sub> (14 mg, 0.015 mmol), dry Hünig's base (5 mL) and dry chloroform (10 mL). Compound **8** (43 mg, 0.06 mmol, 31%) was obtained as orange solid. <sup>1</sup>H NMR (300 MHz, CDCl<sub>3</sub>) δ = 7.76 (d, *J*=9.0, 1H), 7.32 (d, *J*=9.0, 1H), 7.14 (s, 1H), 7.02 (s, 1H), 6.88 – 6.64 (m, 2H), 6.59 – 6.33 (m, 2H), 6.07 (s, 1H), 1.34 – 1.17 (m, 42H). <sup>13</sup>C NMR (75 MHz, CDCl<sub>3</sub>) δ = 151.68, 143.61, 142.12, 140.38, 139.25, 138.99, 138.37, 128.69, 128.36, 128.06, 123.54, 123.31, 119.54, 113.93, 113.81, 112.91, 104.66, 104.51, 99.40, 99.25, 96.91, 96.76, 18.93, 18.89, 11.43, 11.42.

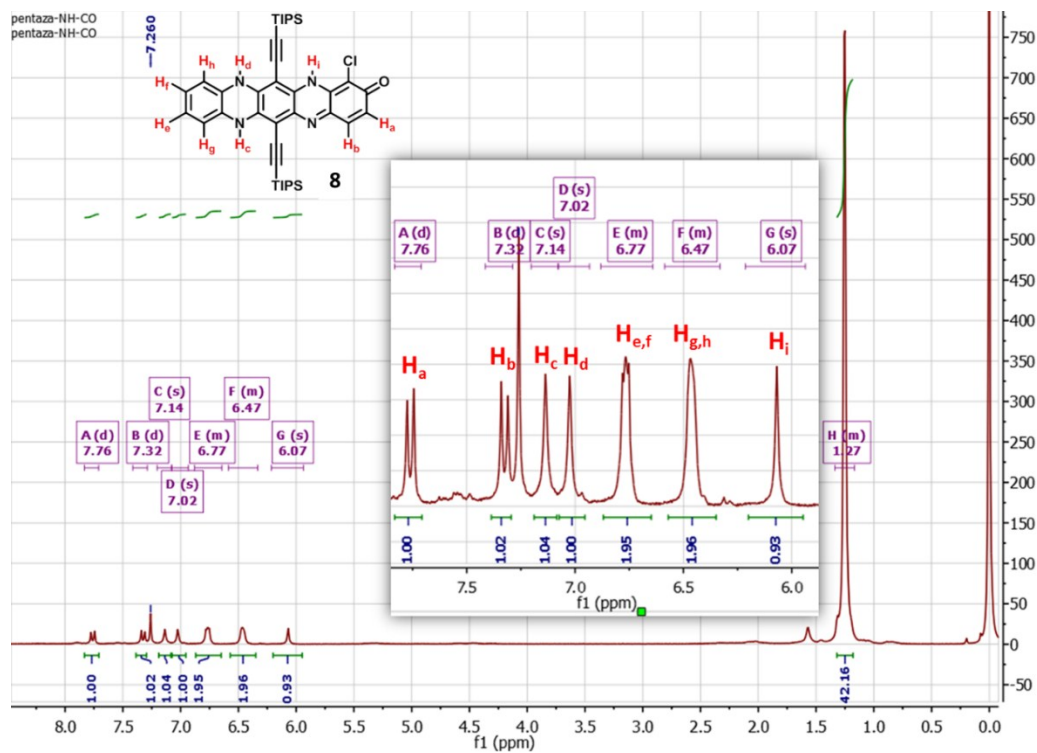

Figure S7. <sup>1</sup>H NMR spectrum of compound 8

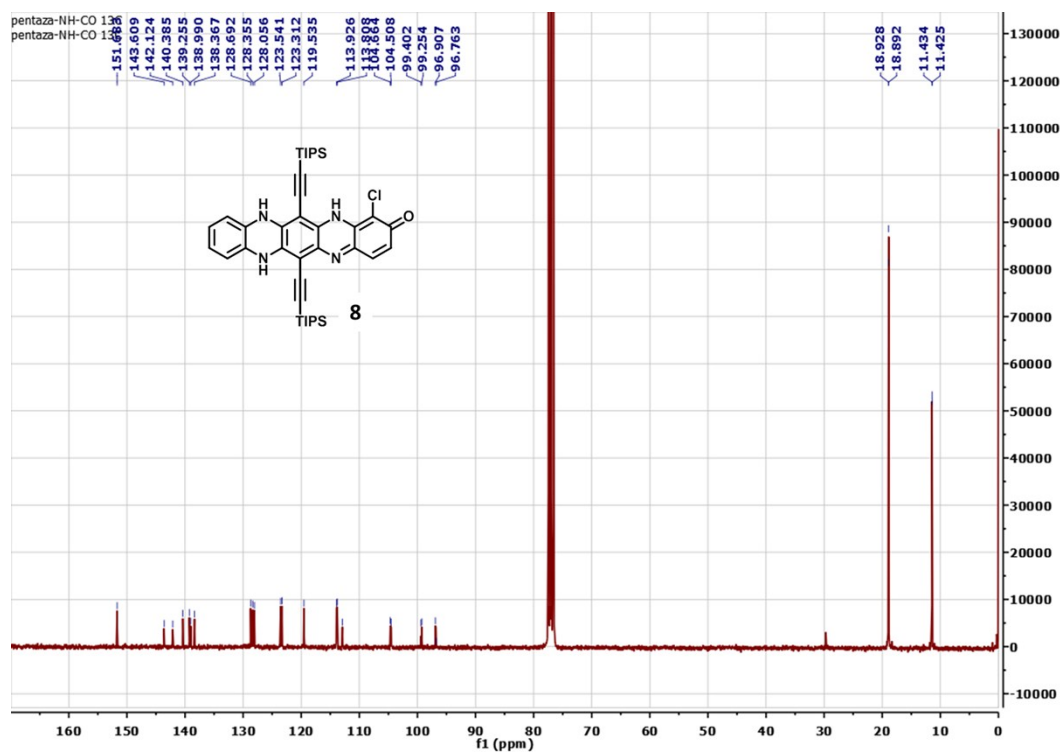

Figure S8. <sup>13</sup>C NMR spectrum of compound 8



## Single Mass Analysis

Tolerance = 20.0 PPM / DBE: min = -1.5, max = 50.0

Element prediction: Off

Number of isotope peaks used for i-FIT = 3

Monoisotopic Mass, Even Electron Ions

28 formula(e) evaluated with 1 results within limits (up to 50 closest results for each mass)

Elements Used:

C: 17-40 H: 17-52 N: 0-4 O: 0-1 Si: 1-2 Cl: 0-1

C40H51ClN4OSi2

wz12 3 (0.082) Cm (1:160)

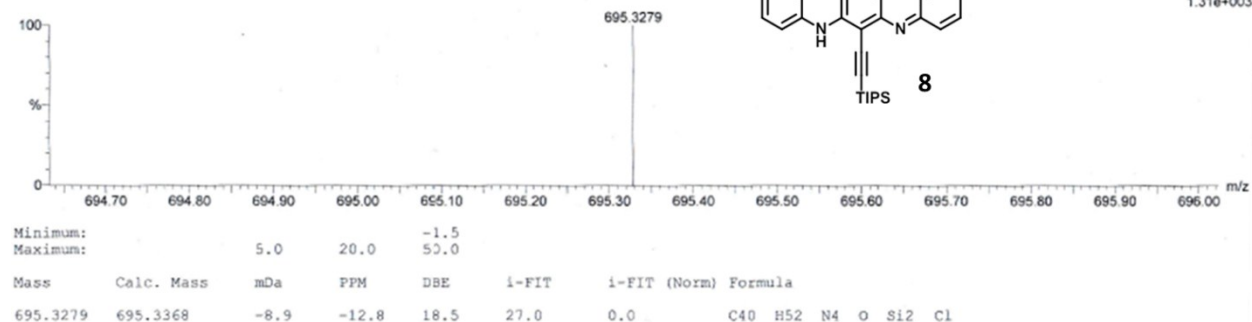Figure S9. HR-MS spectrum of compound **8**

### 6,17-bis((triisopropylsilyl)ethynyl)naphtho[2,3-b]quinoxalino[2,3-i]phenazine-8,15-dione (Hept-CO)

Compound **5** (50 mg, 0.06 mmol) was treated with excess amount active MnO<sub>2</sub> in dry methylene chloride (20 mL) at room temperature for about 2 h. The solution turned to dark green, immediately. The completion of the reaction was confirmed by thin layer chromatography (TLC). Subsequently, MnO<sub>2</sub> was removed by filtration through celite and washed with methylene chloride until the filtrate was colorless. After removing the solvent, the solid was dissolved in small amount diethyl ether and reprecipitated by adding methanol. The solid was collected by filtration and washed with methanol to afford pure **Hept-CO** (32 mg, 0.04 mmol, 65%) as black solid. <sup>1</sup>H NMR (300 MHz, CDCl<sub>3</sub>) δ = 9.13 (s, 2H), 8.33 – 8.23 (m, 2H), 8.23 – 8.14 (m, 2H), 7.97 – 7.87 (m, 2H), 7.86 – 7.72 (m, 2H), 1.49 – 1.26 (m, 42H). <sup>13</sup>C NMR (75 MHz, CDCl<sub>3</sub>) δ = 180.21, 145.93, 145.71, 144.14, 142.36, 135.67, 132.94, 131.17, 130.64, 130.40, 130.37, 130.32, 125.75, 115.45, 101.65, 18.94, 11.71. HR-MS (ESI) m/z Calc. for [M+H]<sup>+</sup> C<sub>48</sub>H<sub>53</sub>N<sub>4</sub>O<sub>2</sub>Si<sub>2</sub>: 773.3707, found : 773.3686.

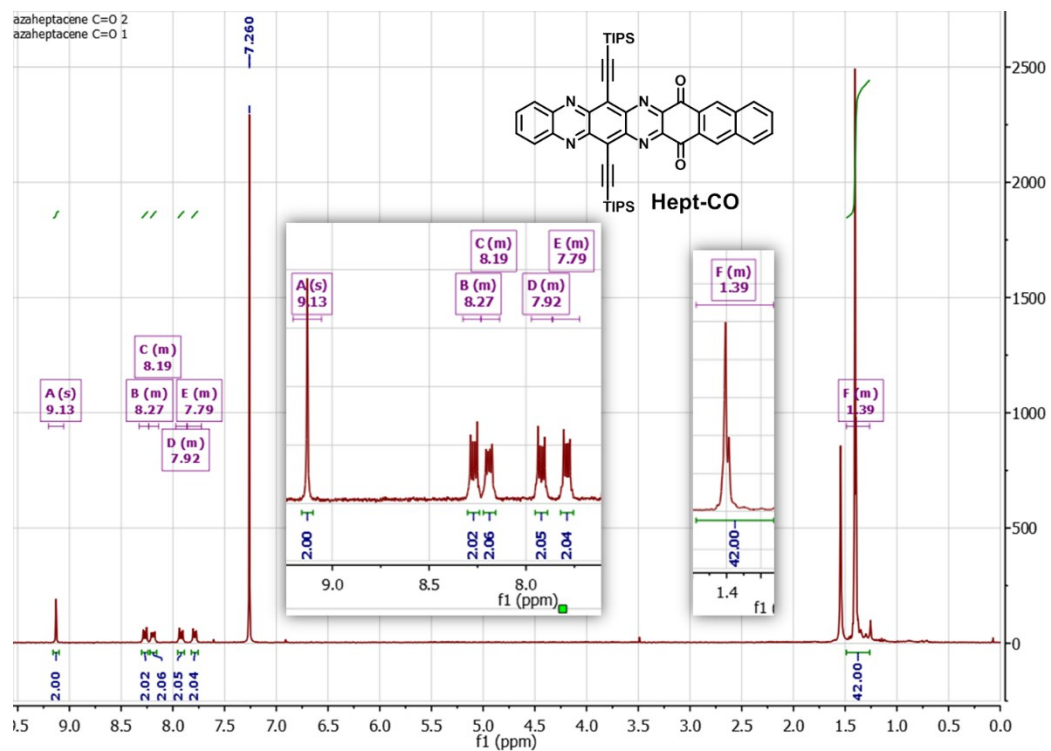

Figure S10.  $^1\text{H}$  NMR spectrum of compound Hept-CO

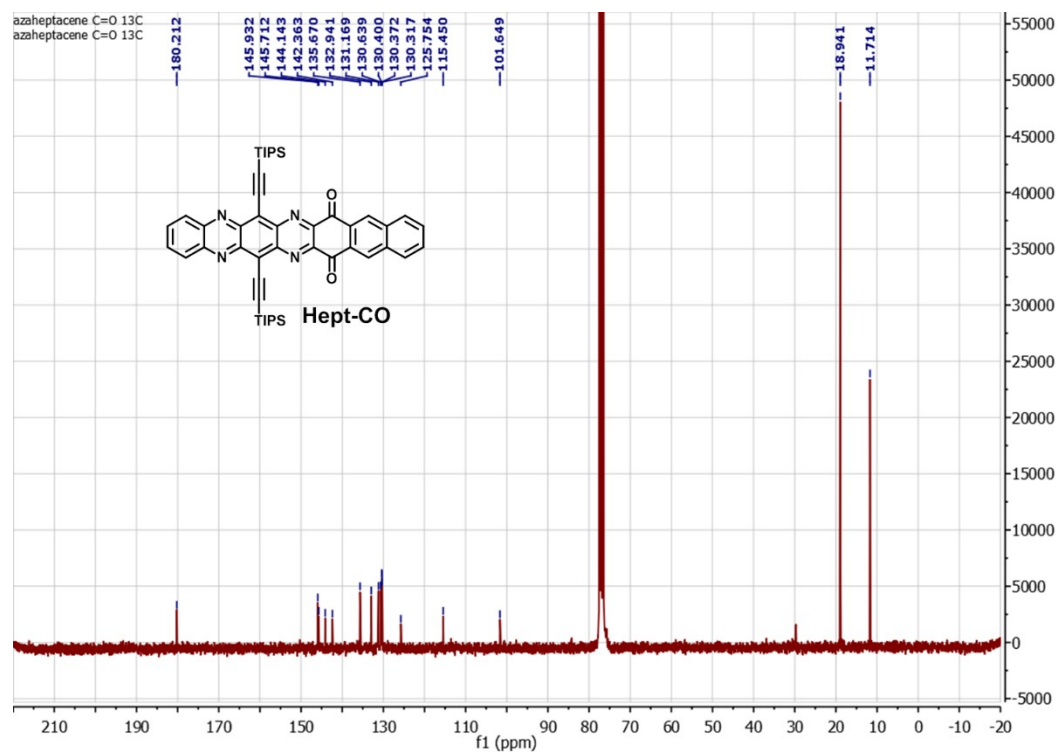

Figure S11.  $^{13}\text{C}$  NMR spectrum of compound Hept-CO

## Single Mass Analysis

Tolerance = 10.0 PPM / DBE: min = -1.5, max = 50.0

Element prediction: Off

Number of isotope peaks used for i-FIT = 2

Monoisotopic Mass, Even Electron Ions

16 formula(e) evaluated with 1 results within limits (up to 50 closest results for each mass)

Elements Used:

C: 0-48 H: 0-53 N: 0-4 O: 1-2 Si: 0-2

C48H53N4O2Si2

WZL9 6 (0.138)

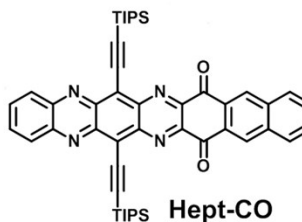1: TOF MS ES+  
5.06e+000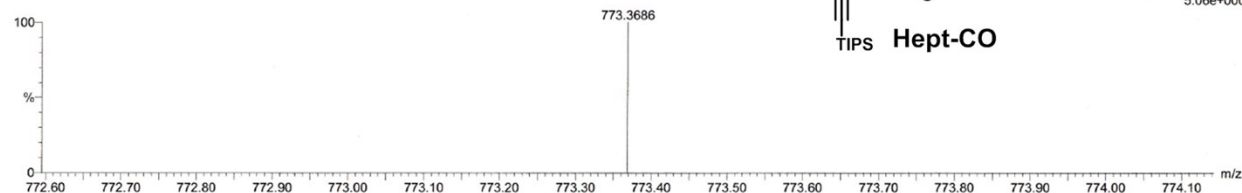

| Minimum: |            |      |      | -1.5 |       |              |                   |  |
|----------|------------|------|------|------|-------|--------------|-------------------|--|
| Maximum: | 5.0        | 10.0 |      | 50.0 |       |              |                   |  |
| Mass     | Calc. Mass | mDa  | PPM  | DBE  | i-FIT | i-FIT (Norm) | Formula           |  |
| 773.3686 | 773.3707   | -2.1 | -2.7 | 26.5 | 11.9  | 0.0          | C48 H53 N4 O2 Si2 |  |

Figure S12. HR-MS spectrum of compound **Hept-CO**

### 6,15-bis((triisopropylsilyl)ethynyl)benzo[b]quinoxalino[2,3-i]phenazine-8,13-dione (**Hex-CO**)

**Hex-CO** was synthesized according to the same procedure for the preparation of **Hept-CO**, by using compound **6** (50 mg, 0.07 mmol). Pure **Hex-CO** (28 mg, 0.04 mmol, 56%) was obtained as black solid.  $^1\text{H}$  NMR (300 MHz,  $\text{CDCl}_3$ )  $\delta$  = 8.60 – 8.50 (m, 2H), 8.31 – 8.22 (m, 2H), 8.00 – 7.88 (m, 4H), 1.46 – 1.27 (m, 42H).  $^{13}\text{C}$  NMR (75 MHz,  $\text{CDCl}_3$ )  $\delta$  = 180.04, 145.87, 145.04, 144.07, 142.27, 135.23, 134.63, 132.96, 130.57, 128.47, 125.78, 115.44, 101.52, 18.92, 11.69.

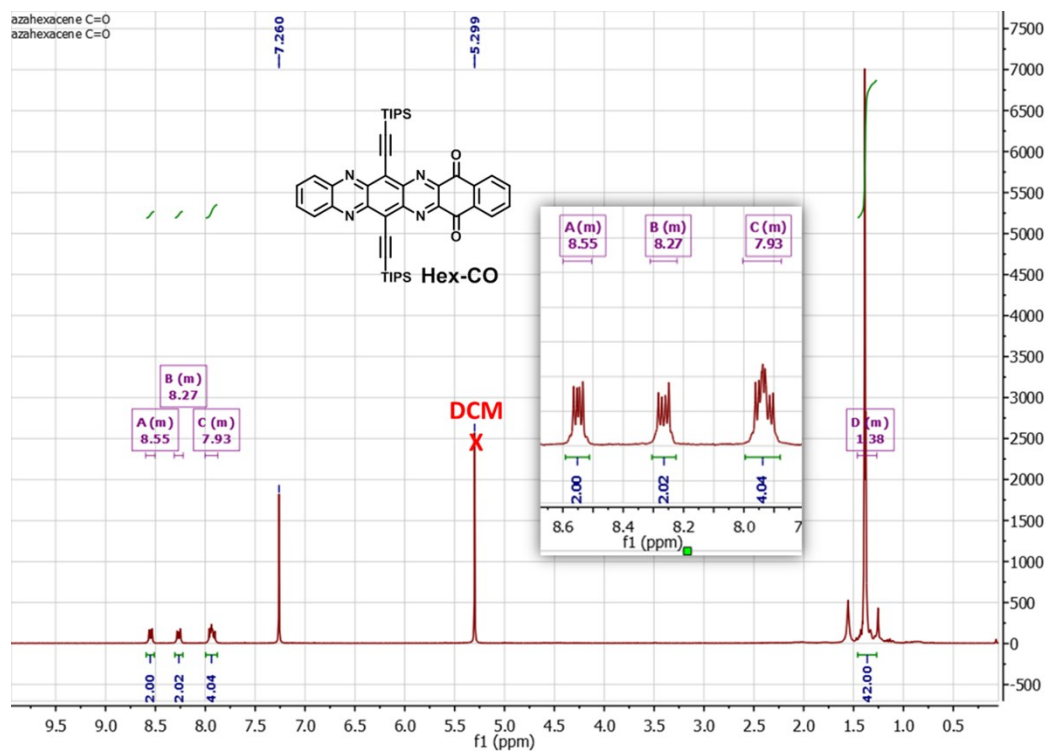

Figure S13.  $^1\text{H}$  NMR spectrum of compound Hex-CO

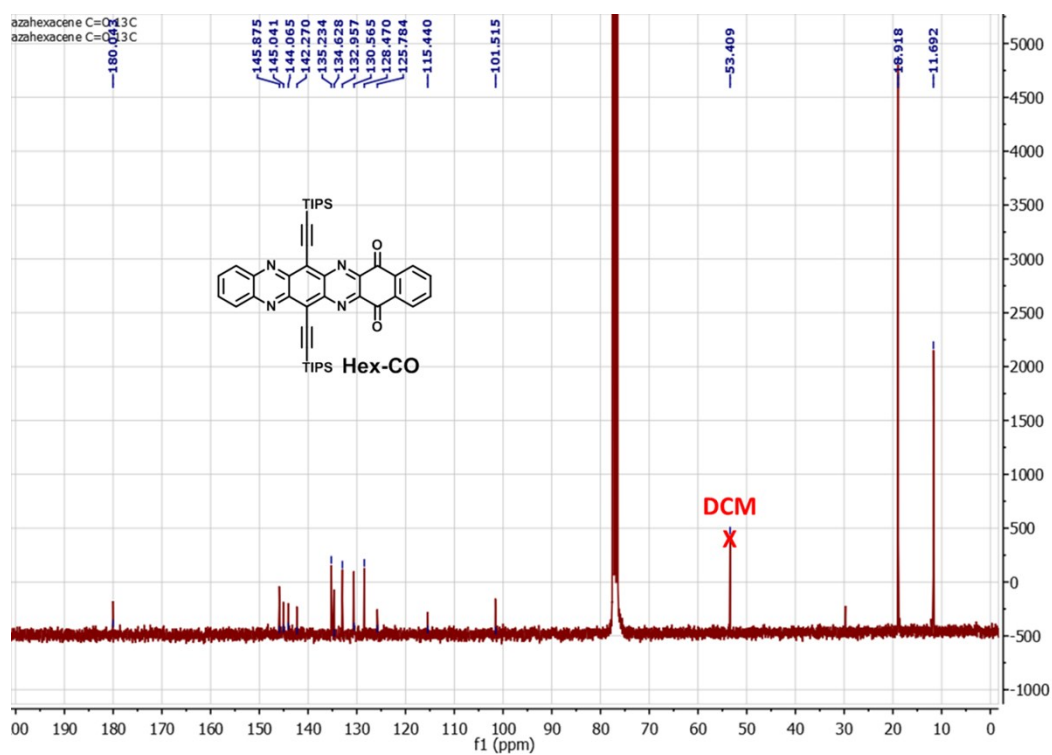

Figure S14.  $^{13}\text{C}$  NMR spectrum of compound Hex-CO

## Single Mass Analysis

Tolerance = 20.0 PPM / DBE: min = -1.5, max = 50.0

Element prediction: Off

Number of isotope peaks used for i-FIT = 3

Monoisotopic Mass, Even Electron Ions

13 formula(e) evaluated with 1 results within limits (up to 50 closest results for each mass)

Elements Used:

C: 17-44 H: 17-51 N: 0-4 O: 0-2 Si: 1-2

C<sub>44</sub>H<sub>50</sub>N<sub>4</sub>O<sub>2</sub>Si<sub>2</sub>

wz11 4 (0.101) Cm (1:104)

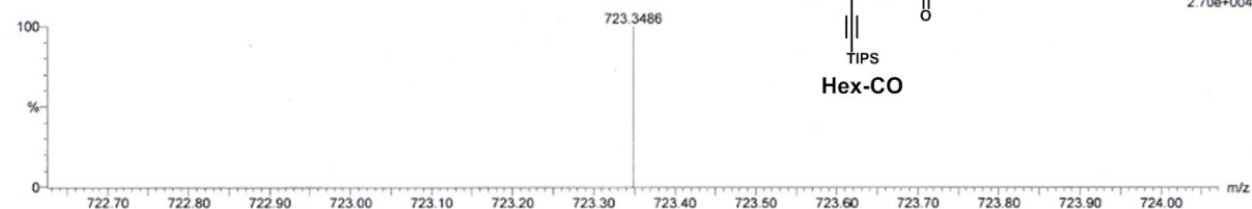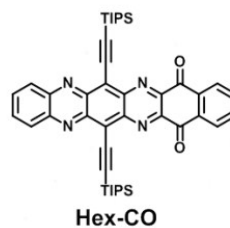1: TOF MS ES+  
2.70e+004

| Minimum: |            |      |      |      |       |              |                                                                               |  |
|----------|------------|------|------|------|-------|--------------|-------------------------------------------------------------------------------|--|
| Maximum: | 5.0        | 20.0 | -1.5 | 50.0 |       |              |                                                                               |  |
| Mass     | Calc. Mass | mDa  | PPM  | DBE  | i-FIT | i-FIT (Norm) | Formula                                                                       |  |
| 723.3486 | 723.3551   | -6.5 | -9.0 | 23.5 | 34.0  | 0.0          | C <sub>44</sub> H <sub>51</sub> N <sub>4</sub> O <sub>2</sub> Si <sub>2</sub> |  |

Figure S15. HR-MS spectrum of compound Hex-CO

## Supporting Figures

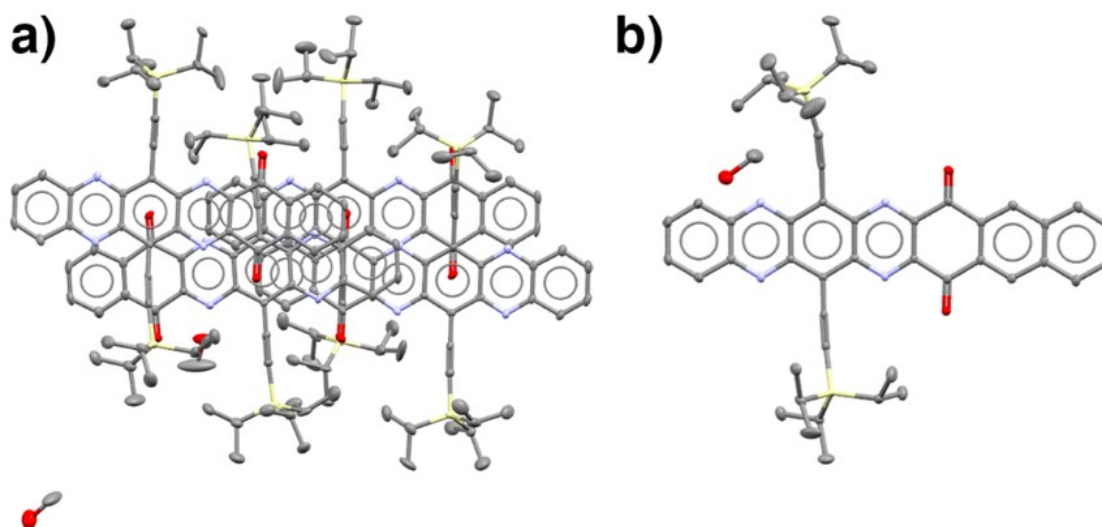

Figure S16. Molecular crystal structures of Hex-CO (a) and Hept-CO (b) with 50% probability ellipsoid. Colour scheme: C, gray; N, blue; Si, yellow; O, red. H atoms are omitted for clarity.



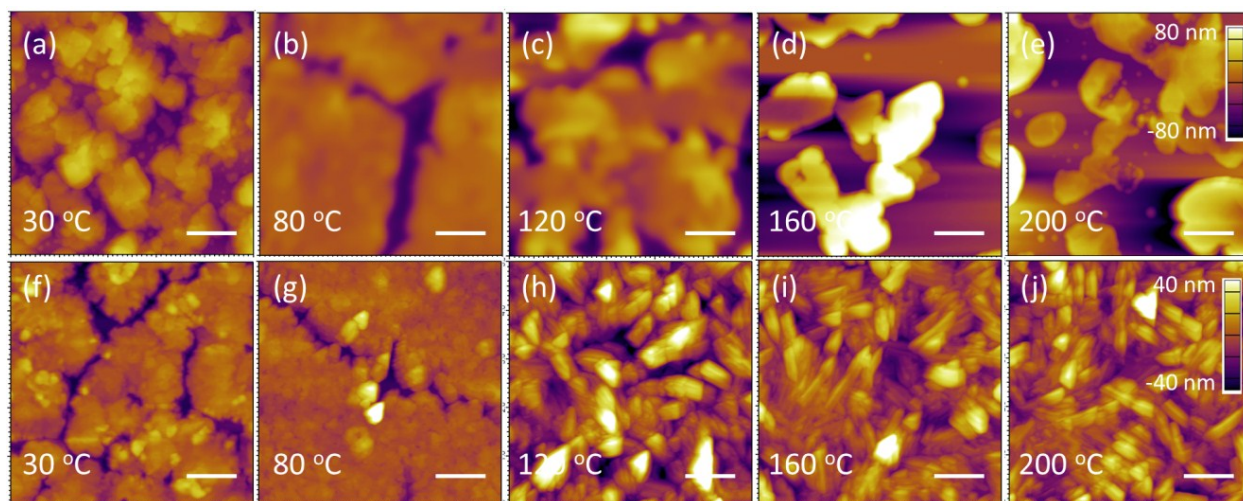

**Figure S17.** AFM images of thin films of (a-e) compounds **Hex-CO** and (f-j) **Hept-CO** at different annealing temperatures

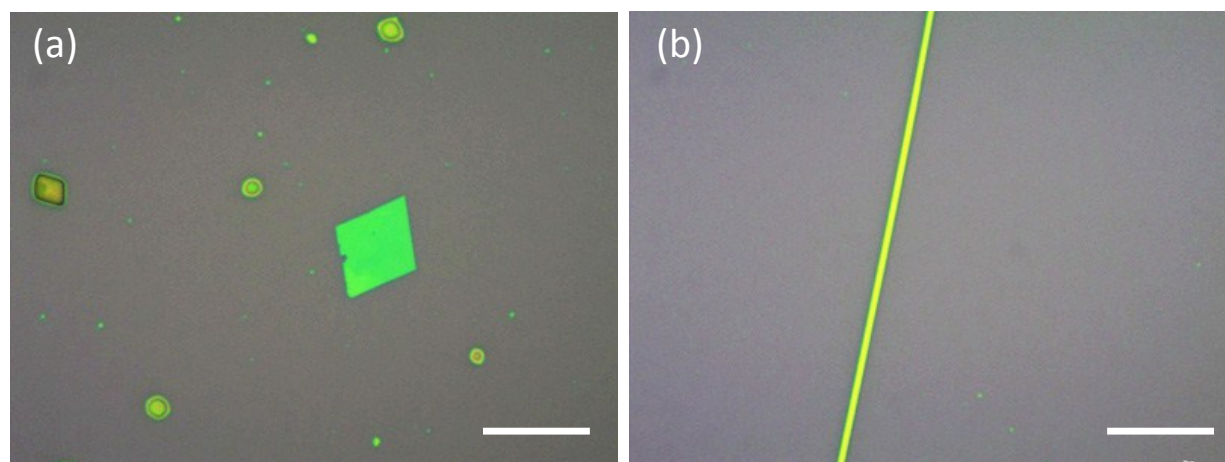

**Figure S18.** Images of the as-casted micro crystals of (a) **Hex-CO** and (b) **Hept-CO** (scale bar: 20 μm).

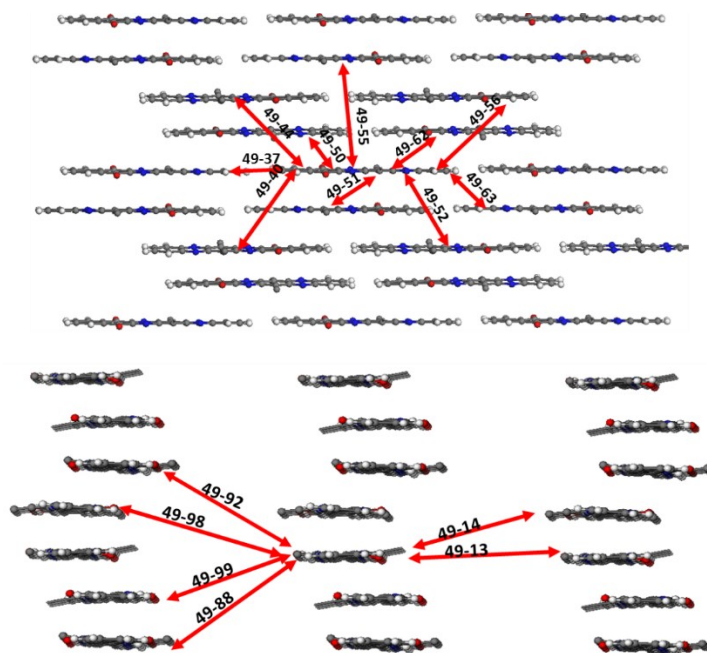

**Figure S19.** Hopping route of **Hex-CO** in the crystal (the hydrogen atoms are omitted for clarification); The intermolecular electronic couplings of hole transfer ( $V_h$ ) and electron transfer ( $V_e$ ) for the center molecule **49** are calculated at DFT/B3LYP/6-31G(d) level, which were obtained through a direct evaluation of the coupling element between frontier orbitals using the unperturbed density matrix of the dimer Fock operator<sup>2,3</sup>

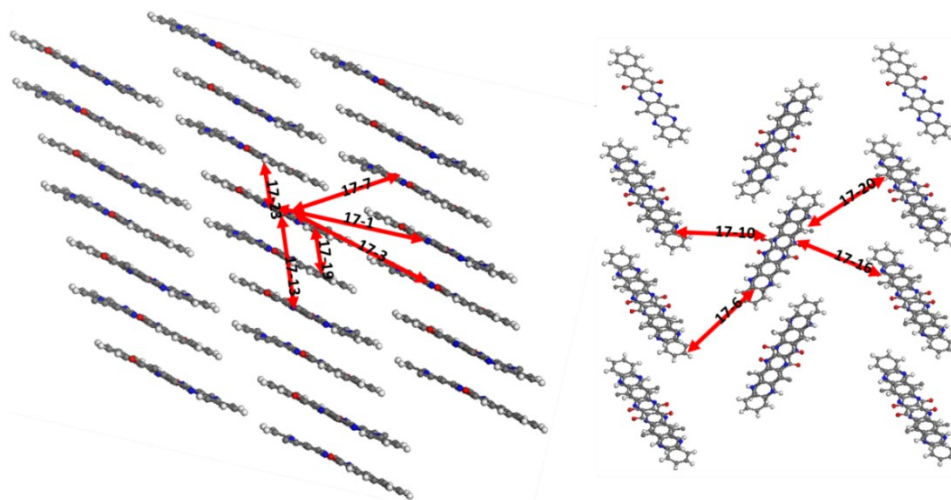

**Figure S20.** Hopping route of **Hept-CO** in the crystal (the hydrogen atoms are omitted for clarification); The intermolecular electronic couplings of hole transfer ( $V_h$ ) and electron transfer ( $V_e$ ) for the center molecule **17** are calculated at DFT/B3LYP/6-31G(d) level, which were obtained through a direct evaluation of the coupling element between frontier orbitals using the unperturbed density matrix of the dimer Fock operator<sup>2,3</sup>

## Supporting Tables

**Table S1.** Crystallographic data and structure refinement parameters of **Hex-CO** and **Hept-CO**

|                                                              | <b>Hex-CO</b>                                                                  | <b>Hept-CO</b>                                                                |
|--------------------------------------------------------------|--------------------------------------------------------------------------------|-------------------------------------------------------------------------------|
| CCDC number                                                  | 1577484                                                                        | 1577485                                                                       |
| <i>T</i> (K)                                                 | 90                                                                             | 100                                                                           |
| Formula                                                      | C <sub>89</sub> H <sub>104</sub> N <sub>8</sub> O <sub>5</sub> Si <sub>4</sub> | C <sub>49</sub> H <sub>56</sub> N <sub>4</sub> O <sub>3</sub> Si <sub>2</sub> |
| Formula weight                                               | 1478.16                                                                        | 805.15                                                                        |
| Crystal system                                               | Triclinic                                                                      | Monoclinic                                                                    |
| Space group                                                  | <i>P</i>                                                                       | <i>P</i> 2 <sub>1</sub> / <i>c</i>                                            |
| <i>a</i> (Å)                                                 | 21.5519 (19)                                                                   | 12.3896 (17)                                                                  |
| <i>b</i> (Å)                                                 | 21.7004 (18)                                                                   | 13.6687 (19)                                                                  |
| <i>c</i> (Å)                                                 | 22.1556 (19)                                                                   | 23.797 (3)                                                                    |
| $\alpha$ (deg)                                               | 63.925 (2)                                                                     | 90                                                                            |
| $\beta$ (deg)                                                | 85.605 (2)                                                                     | 95.3293 (7)                                                                   |
| $\gamma$ (deg)                                               | 63.452 (2)                                                                     | 90                                                                            |
| <i>V</i> (Å <sup>3</sup> )                                   | 8232.8 (12)                                                                    | 4354.78 (16)                                                                  |
| $\lambda$ (Mo K $\alpha$ ) (Å)                               | 0.71073                                                                        | 0.71073                                                                       |
| Collected reflns                                             | 44233                                                                          | 32275                                                                         |
| Unique reflns                                                | 28625                                                                          | 8878                                                                          |
| Parameters                                                   | 1962                                                                           | 538                                                                           |
| <i>R</i> (int)                                               | 0.0536                                                                         | 0.0359                                                                        |
| <i>R</i> <sub>1</sub> [ <i>I</i> > 2 $\sigma$ ( <i>I</i> )]  | 0.0838                                                                         | 0.0542                                                                        |
| <i>wR</i> <sub>2</sub> [ <i>I</i> > 2 $\sigma$ ( <i>I</i> )] | 0.2079                                                                         | 0.1217                                                                        |
| GOF                                                          | 1.059                                                                          | 1.015                                                                         |



**Table S2.** The electronic couplings for all the hopping pathways of **Hex-CO**

| Pathway | center-center/Å | $V_h$ /meV | $V_e$ /meV |
|---------|-----------------|------------|------------|
| 49-13   | 18.54000        | -0.05264   | -0.01507   |
| 49-14   | 18.23855        | 0.06780    | 0.01242    |
| 49-37   | 18.32299        | 0.00187    | 2.75964    |
| 49-40   | 14.64957        | 0.00004    | -0.01632   |
| 49-44   | 15.11292        | 0.00003    | -0.01906   |
| 49-50   | 9.59044         | 8.03378    | 33.09652   |
| 49-51   | 6.42003         | 1.24167    | 64.90778   |
| 49-52   | 8.72079         | 1.05133    | 0.15240    |
| 49-55   | 10.22879        | 0.01801    | -0.00035   |
| 49-56   | 8.89166         | 0.02832    | 0.03702    |
| 49-62   | 9.19673         | 23.62718   | 61.70732   |
| 49-63   | 15.19850        | 0.08386    | 13.70639   |
| 49-88   | 16.51413        | 6.33952    | 0.12215    |
| 49-92   | 16.53417        | 3.48570    | -0.04805   |
| 49-98   | 17.94120        | 0.42835    | -0.03586   |
| 49-99   | 17.92299        | -5.66182   | 0.02745    |

**Table S3.** The electronic couplings for all the hopping pathways of **Hept-CO**

| Pathway | center-center/Å | $V_h$ /meV | $V_e$ /meV |
|---------|-----------------|------------|------------|
| 17-1    | 16.84221        | 0.00963    | -0.45449   |
| 17-3    | 15.45878        | 0.00780    | 0.02369    |
| 17-6    | 16.58695        | 0.02024    | 0.17297    |

|       |          |           |           |
|-------|----------|-----------|-----------|
| 17-7  | 10.17935 | 0.29044   | 0.78468   |
| 17-10 | 17.01898 | -3.59167  | -0.88859  |
| 17-13 | 9.46209  | 4.28320   | 2.55473   |
| 17-16 | 19.00192 | 0.23908   | -0.22320  |
| 17-19 | 5.62160  | 51.62460  | 96.54010  |
| 17-20 | 17.34167 | 0.14136   | -0.04044  |
| 17-23 | 8.67819  | -22.30476 | -51.13719 |

---

## Reference

- (1) G. M. Sheldrick, *Acta Crystallogr. Sect. A* 2008, **64**, 112-122
- (2) E. F. Valeev, V. Coropceanu, D. A. da Silva Filho, S. Salman, J.-L. Brédas, *J. Am. Chem. Soc.* 2006, **128**, 9882-9886;
- (3) A. Troisi, G. Orlandi, *J. Phys. Chem. B*, 2002, **106**, 2093-2101.
